# Supplementary material
Source: publisher figshare collection journal article supplement (https://acs.figshare.com/ndownloader/files/4296703)
Supplement: Supplementary file 1 [file 4296703]

data_General
_audit_creation_date                  '2011-03-16'
_audit_creation_method                'by CrystalStructure 3.6.0'
_audit_update_record                   ?

#==============================================================================

# PROCESSING SUMMARY (IUCr Office Use Only)

_journal_date_recd_electronic     ?
_journal_date_from_coeditor       ?
_journal_date_accepted            ?
_journal_coeditor_code            ?

#==============================================================================

# SUBMISSION DETAILS

_publ_contact_author_name             'ENTER NAME'
_publ_contact_author_email            'ENTER EMAIL ADDRESS'
_publ_contact_author_fax              'ENTER FAX NUMBER'
_publ_contact_author_phone            'ENTER PHONE NUMBER'
_publ_contact_letter
;
    ENTER TEXT OF LETTER
;
_publ_requested_journal               'ENTER JOURNAL NAME HERE'
_publ_requested_category              'CHOOSE FI FM FO CI CM CO or AD'
_publ_requested_coeditor_name          ?

#==============================================================================

# TITLE AND AUTHOR LIST

_publ_section_title
;
    ENTER SECTION TITLE
;
_publ_section_title_footnote
;
    ENTER FOOTNOTE TO TITLE OF PAPER
;
loop_
_publ_author_name
_publ_author_footnote
_publ_author_address
' FIRST AUTHORS NAME '
;
  FIRST AUTHORS FOOTNOTES
;
;
  FIRST AUTHORS ADDRESS
;
_publ_section_synopsis
;
  ENTER SYNOPSIS
;

#==============================================================================

# TEXT

_publ_section_abstract
;
    ENTER ABSTRACT
;
_publ_section_comment
;
    ENTER TEXT
;
_publ_section_references
;
    ENTER OTHER REFERENCES

    Rigaku/MSC and Rigaku Corporation. (2004).
    CrystalStructure 3.6.0.
    Single Crystal Structure Analysis Software.
    Rigaku/MSC, 9009 New Trails Drive, The Woodlands, TX, USA 77381-5209.
    Rigaku, 3-9-12 Akishima, Tokyo 196-8666, Japan.

    Watkin, D.J., Prout, C.K. Carruthers, J.R. & Betteridge, P.W. (1996)
    CRYSTALS Issue 10, Chemical Crystallography Laboratory, Oxford, UK.

    Larson, A. C. (1970), Crystallographic Computing, 291-294.
    ed F. R. Ahmed, Munksgaard, Copenhagen.

;
_publ_section_figure_captions
;
    ENTER FIGURE CAPTIONS
;
_publ_section_exptl_prep
;
    ENTER COMPOUND PREPARATION DETAILS
;
_publ_section_exptl_refinement
;
    ENTER SPECIAL DETAILS OF THE REFINEMENT
;

#==============================================================================

data__anti-3ac

#==============================================================================

# CHEMICAL DATA

_chemical_formula_sum                  'C28 H29 F3 N2 O2 Si '
_chemical_formula_moiety               'C28 H29 F3 N2 O2 Si '
_chemical_formula_weight               510.63
_chemical_melting_point                ?

#==============================================================================

# CRYSTAL DATA
_symmetry_cell_setting                 triclinic
_symmetry_space_group_name_H-M        'P -1'
_symmetry_space_group_name_Hall       '-P 1'
_symmetry_Int_Tables_number            2
loop_
_symmetry_equiv_pos_site_id
_symmetry_equiv_pos_as_xyz
1   '+X,+Y,+Z'
2   '-X,-Y,-Z'

#------------------------------------------------------------------------------

_cell_length_a                         10.491(1)
_cell_length_b                         10.657(1)
_cell_length_c                         13.007(1)
_cell_angle_alpha                      96.564(3)
_cell_angle_beta                       103.027(3)
_cell_angle_gamma                      110.125(3)
_cell_volume                           1300.7(2)
_cell_formula_units_Z                  2
_cell_measurement_reflns_used          10215
_cell_measurement_theta_min            3.1
_cell_measurement_theta_max            27.6
_cell_measurement_temperature          296.1

#------------------------------------------------------------------------------

_exptl_crystal_description            'prism'
_exptl_crystal_colour                 'colorless'
_exptl_crystal_size_max                0.70
_exptl_crystal_size_mid                0.60
_exptl_crystal_size_min                0.50
_exptl_crystal_density_diffrn          1.304
_exptl_crystal_density_meas            ?
_exptl_crystal_density_method         'not measured'
_exptl_crystal_F_000                   536.00
_exptl_absorpt_coefficient_mu          0.140
_exptl_absorpt_correction_type         none

#==============================================================================

# EXPERIMENTAL DATA

_diffrn_radiation_type                'Mo K\a'
_diffrn_radiation_wavelength           0.7107
_diffrn_measurement_device_type       'Rigaku RAXIS-RAPID'
_diffrn_measurement_method             \w
_diffrn_detector_area_resol_mean       10.00
_diffrn_reflns_number                  12952
_diffrn_reflns_av_R_equivalents        0.135
_diffrn_reflns_theta_max               27.48
_diffrn_measured_fraction_theta_max    0.9918
_diffrn_reflns_theta_full              27.48
_diffrn_measured_fraction_theta_full   0.9918
_diffrn_reflns_limit_h_min             -13
_diffrn_reflns_limit_h_max             13
_diffrn_reflns_limit_k_min             -12
_diffrn_reflns_limit_k_max             13
_diffrn_reflns_limit_l_min             -16
_diffrn_reflns_limit_l_max             16

#==============================================================================

# REFINEMENT DATA

_refine_special_details
;
    Refinement using reflections with F^2^ > 3.0 sigma(F^2^).
    The weighted R-factor(wR), goodness of fit (S) and R-factor (gt) are 
    based on F, with F set to zero for negative F. The threshold expression of
    F^2^ > 2.0 sigma(F^2^) is used only for calculating R-factor (gt).
;
_reflns_number_total                   12952
_reflns_number_gt                      6806
_reflns_threshold_expression           F^2^>2.0\s(F^2^)
_refine_ls_structure_factor_coef       F
_refine_ls_R_factor_gt                 0.0770
_refine_ls_wR_factor_ref               0.1120
_refine_ls_hydrogen_treatment          refall
_refine_ls_number_reflns               6806
_refine_ls_number_parameters           442
_refine_ls_goodness_of_fit_ref         0.875
_refine_ls_weighting_scheme            calc
_refine_ls_weighting_details
'w = 1/[0.0010Fo^2^ + 3.0000\s(Fo^2^) + 0.5000]'
_refine_ls_shift/su_max                0.0000
_refine_diff_density_max               1.67
_refine_diff_density_min               -0.98
_refine_ls_extinction_method           
   'Larson (1970) Crystallographic Computing eq. 22'
_refine_ls_extinction_coef             77(46)

loop_
_atom_type_symbol
_atom_type_description
_atom_type_scat_dispersion_real
_atom_type_scat_dispersion_imag
_atom_type_scat_source
  'C' 'C'  0.003 0.002 
;
International Tables for Crystallography
(1992, Vol. C, Tables 4.2.6.8 and 6.1.1.4)
;
  'H' 'H'  0.000 0.000 
;
International Tables for Crystallography
(1992, Vol. C, Table 6.1.1.4)
;
  'F' 'F'  0.017 0.010 
;
International Tables for Crystallography
(1992, Vol. C, Tables 4.2.6.8 and 6.1.1.4)
;
  'N' 'N'  0.006 0.003 
;
International Tables for Crystallography
(1992, Vol. C, Tables 4.2.6.8 and 6.1.1.4)
;
  'O' 'O'  0.011 0.006 
;
International Tables for Crystallography
(1992, Vol. C, Tables 4.2.6.8 and 6.1.1.4)
;
  'Si' 'Si'  0.082 0.070 
;
International Tables for Crystallography
(1992, Vol. C, Tables 4.2.6.8 and 6.1.1.4)
;

#==============================================================================

# ATOMIC COORDINATES AND THERMAL PARAMETERS

loop_
_atom_site_label
_atom_site_type_symbol
_atom_site_fract_x
_atom_site_fract_y
_atom_site_fract_z
_atom_site_U_iso_or_equiv
_atom_site_adp_type
_atom_site_occupancy
_atom_site_symmetry_multiplicity
_atom_site_calc_flag
_atom_site_refinement_flags
_atom_site_disorder_assembly
_atom_site_disorder_group
 Si(1)  Si 0.60542(9)  0.7240(1)   0.85866(8)  0.0226(3)   Uani 1.00 1 d . . .
 F(1)   F  0.7831(3)   1.3124(2)   0.6331(2)   0.0575(8)   Uani 1.00 1 d . . .
 F(2)   F  0.5890(2)   1.1541(3)   0.5457(3)   0.0659(9)   Uani 1.00 1 d . . .
 F(3)   F  0.7653(3)   1.1948(3)   0.4854(2)   0.063(1)    Uani 1.00 1 d . . .
 O(1)   O  0.7623(2)   0.4789(3)   0.9063(2)   0.0253(6)   Uani 1.00 1 d . . .
 O(2)   O  0.9535(2)   0.4437(2)   0.8861(2)   0.0214(6)   Uani 1.00 1 d . . .
 N(1)   N  0.9145(2)   0.6156(3)   0.8220(2)   0.0172(7)   Uani 1.00 1 d . . .
 N(2)   N  0.9193(3)   0.8186(3)   0.7826(2)   0.0202(7)   Uani 1.00 1 d . . .
 C(9)   C  0.7791(3)   0.8653(4)   0.6250(3)   0.0209(9)   Uani 1.00 1 d . . .
 C(10)  C  0.8430(3)   1.1253(4)   0.7404(3)   0.0223(9)   Uani 1.00 1 d . . .
 C(11)  C  0.8581(3)   0.9044(3)   0.7341(3)   0.0199(9)   Uani 1.00 1 d . . .
 C(12)  C  0.4563(3)   0.4693(3)   0.6478(3)   0.0181(8)   Uani 1.00 1 d . . .
 C(13)  C  0.6843(3)   0.6438(3)   0.7667(3)   0.0171(8)   Uani 1.00 1 d . . .
 C(14)  C  0.6126(3)   0.5322(3)   0.6868(3)   0.0190(8)   Uani 1.00 1 d . . .
 C(15)  C  0.3808(3)   0.5343(4)   0.5912(3)   0.0221(9)   Uani 1.00 1 d . . .
 C(16)  C  0.2304(3)   0.2803(4)   0.6302(3)   0.0224(9)   Uani 1.00 1 d . . .
 C(17)  C  0.8649(3)   0.5107(3)   0.8741(3)   0.0188(8)   Uani 1.00 1 d . . .
 C(18)  C  0.1560(4)   0.1522(4)   0.6516(3)   0.029(1)    Uani 1.00 1 d . . .
 C(19)  C  0.7242(3)   1.1853(4)   0.5758(3)   0.0266(9)   Uani 1.00 1 d . . .
 C(20)  C  0.2316(4)   0.4774(4)   0.5536(3)   0.026(1)    Uani 1.00 1 d . . .
 C(21)  C  1.1661(4)   0.7569(4)   0.9191(3)   0.026(1)    Uani 1.00 1 d . . .
 C(22)  C  0.3802(3)   0.3375(3)   0.6669(3)   0.0193(8)   Uani 1.00 1 d . . .
 C(23)  C  0.5358(4)   0.8484(4)   0.8023(4)   0.033(1)    Uani 1.00 1 d . . .
 C(24)  C  1.0638(3)   0.6425(3)   0.8235(3)   0.0191(8)   Uani 1.00 1 d . . .
 C(25)  C  0.7356(3)   0.9559(4)   0.5749(3)   0.0214(9)   Uani 1.00 1 d . . .
 C(26)  C  0.1590(3)   0.3536(4)   0.5729(3)   0.0244(9)   Uani 1.00 1 d . . .
 C(27)  C  0.4591(4)   0.5882(4)   0.8874(3)   0.028(1)    Uani 1.00 1 d . . .
 C(28)  C  1.0665(4)   0.5032(4)   0.8390(3)   0.0234(9)   Uani 1.00 1 d . . .
 C(29)  C  0.8434(3)   0.7001(3)   0.7900(3)   0.0177(8)   Uani 1.00 1 d . . .
 C(30)  C  0.4516(4)   0.2654(4)   0.7270(3)   0.026(1)    Uani 1.00 1 d . . .
 C(31)  C  0.8905(3)   1.0344(3)   0.7894(3)   0.0224(9)   Uani 1.00 1 d . . .
 C(32)  C  0.7679(3)   1.0866(3)   0.6317(3)   0.0209(9)   Uani 1.00 1 d . . .
 C(33)  C  0.3754(4)   0.1416(4)   0.7456(3)   0.032(1)    Uani 1.00 1 d . . .
 C(34)  C  0.2268(4)   0.0845(4)   0.7082(3)   0.032(1)    Uani 1.00 1 d . . .
 C(35)  C  0.7514(4)   0.8130(5)   0.9867(3)   0.038(1)    Uani 1.00 1 d . . .
 C(36)  C  1.0921(4)   0.6691(4)   0.7173(3)   0.025(1)    Uani 1.00 1 d . . .
 H(1)   H  1.156(3)    0.507(3)    0.889(3)    0.018(9)    Uiso 1.00 1 c . . .
 H(2)   H  1.043(3)    0.436(3)    0.763(2)    0.009(7)    Uiso 1.00 1 c . . .
 H(3)   H  1.190(3)    0.666(3)    0.723(2)    0.013(8)    Uiso 1.00 1 c . . .
 H(4)   H  1.015(4)    0.600(4)    0.654(3)    0.03(1)     Uiso 1.00 1 c . . .
 H(5)   H  1.091(4)    0.749(5)    0.711(3)    0.05(1)     Uiso 1.00 1 c . . .
 H(6)   H  1.273(4)    0.778(4)    0.919(3)    0.04(1)     Uiso 1.00 1 c . . .
 H(7)   H  1.150(3)    0.846(4)    0.914(2)    0.018(8)    Uiso 1.00 1 c . . .
 H(8)   H  1.142(4)    0.721(5)    0.979(4)    0.05(1)     Uiso 1.00 1 c . . .
 H(9)   H  0.688(4)    0.928(4)    0.495(3)    0.05(1)     Uiso 1.00 1 c . . .
 H(10)  H  0.766(3)    0.785(3)    0.590(2)    -0.003(7)   Uiso 1.00 1 c . . .
 H(11)  H  0.869(3)    1.216(4)    0.779(3)    0.03(1)     Uiso 1.00 1 c . . .
 H(12)  H  0.947(4)    1.056(4)    0.865(3)    0.05(1)     Uiso 1.00 1 c . . .
 H(13)  H  0.451(5)    0.813(5)    0.733(4)    0.06(1)     Uiso 1.00 1 c . . .
 H(14)  H  0.606(6)    0.936(6)    0.808(5)    0.09(2)     Uiso 1.00 1 c . . .
 H(15)  H  0.490(5)    0.878(5)    0.852(4)    0.06(1)     Uiso 1.00 1 c . . .
 H(16)  H  0.836(4)    0.887(4)    0.973(3)    0.03(1)     Uiso 1.00 1 c . . .
 H(17)  H  0.791(3)    0.745(3)    1.016(2)    0.013(8)    Uiso 1.00 1 c . . .
 H(18)  H  0.725(4)    0.849(4)    1.037(3)    0.03(1)     Uiso 1.00 1 c . . .
 H(19)  H  0.436(3)    0.625(4)    0.949(3)    0.03(1)     Uiso 1.00 1 c . . .
 H(20)  H  0.377(5)    0.547(5)    0.828(4)    0.06(1)     Uiso 1.00 1 c . . .
 H(21)  H  0.484(4)    0.506(4)    0.896(3)    0.04(1)     Uiso 1.00 1 c . . .
 H(22)  H  0.549(3)    0.295(3)    0.753(2)    0.005(7)    Uiso 1.00 1 c . . .
 H(23)  H  0.433(5)    0.096(5)    0.785(4)    0.07(1)     Uiso 1.00 1 c . . .
 H(24)  H  0.179(4)    -0.002(4)   0.724(3)    0.04(1)     Uiso 1.00 1 c . . .
 H(25)  H  0.057(4)    0.127(4)    0.629(3)    0.03(1)     Uiso 1.00 1 c . . .
 H(26)  H  0.061(3)    0.319(3)    0.545(3)    0.021(9)    Uiso 1.00 1 c . . .
 H(27)  H  0.177(3)    0.532(3)    0.518(2)    0.017(8)    Uiso 1.00 1 c . . .
 H(28)  H  0.432(4)    0.617(4)    0.576(3)    0.03(1)     Uiso 1.00 1 c . . .
 H(29)  H  0.665(3)    0.491(3)    0.651(3)    0.019(9)    Uiso 1.00 1 c . . .


loop_
_atom_site_aniso_label
_atom_site_aniso_U_11
_atom_site_aniso_U_22
_atom_site_aniso_U_33
_atom_site_aniso_U_12
_atom_site_aniso_U_13
_atom_site_aniso_U_23
 Si(1)  0.0204(5)   0.0245(6)   0.0236(5)   0.0093(4)   0.0076(4)   0.0029(4)  
 F(1)   0.078(2)    0.029(1)    0.058(2)    0.030(1)    -0.008(1)   0.005(1)   
 F(2)   0.032(1)    0.062(2)    0.119(2)    0.030(1)    0.018(1)    0.048(2)   
 F(3)   0.108(2)    0.078(2)    0.054(2)    0.073(2)    0.049(2)    0.043(2)   
 O(1)   0.020(1)    0.031(1)    0.027(1)    0.009(1)    0.008(1)    0.014(1)   
 O(2)   0.021(1)    0.021(1)    0.024(1)    0.0092(9)   0.006(1)    0.008(1)   
 N(1)   0.015(1)    0.015(1)    0.022(1)    0.004(1)    0.006(1)    0.008(1)   
 N(2)   0.016(1)    0.019(2)    0.024(1)    0.006(1)    0.004(1)    0.007(1)   
 C(9)   0.024(2)    0.014(2)    0.024(2)    0.008(1)    0.007(1)    0.002(1)   
 C(10)  0.023(2)    0.014(2)    0.028(2)    0.006(1)    0.007(1)    0.001(1)   
 C(11)  0.018(2)    0.020(2)    0.028(2)    0.009(1)    0.012(1)    0.014(1)   
 C(12)  0.021(2)    0.016(2)    0.018(2)    0.008(1)    0.008(1)    0.004(1)   
 C(13)  0.015(1)    0.017(2)    0.020(2)    0.005(1)    0.005(1)    0.011(1)   
 C(14)  0.023(2)    0.017(2)    0.022(2)    0.009(1)    0.010(1)    0.007(1)   
 C(15)  0.022(2)    0.018(2)    0.023(2)    0.005(1)    0.007(2)    0.003(1)   
 C(16)  0.020(2)    0.021(2)    0.023(2)    0.006(1)    0.007(1)    -0.000(1)  
 C(17)  0.019(2)    0.018(2)    0.016(2)    0.006(1)    0.001(1)    0.004(1)   
 C(18)  0.024(2)    0.024(2)    0.036(2)    0.004(1)    0.012(2)    0.005(2)   
 C(19)  0.023(2)    0.024(2)    0.030(2)    0.008(1)    0.004(2)    0.005(2)   
 C(20)  0.027(2)    0.031(2)    0.024(2)    0.018(2)    0.004(2)    0.006(2)   
 C(21)  0.019(2)    0.026(2)    0.028(2)    0.007(1)    0.003(2)    0.004(2)   
 C(22)  0.019(2)    0.017(2)    0.020(2)    0.006(1)    0.006(1)    0.001(1)   
 C(23)  0.031(2)    0.026(2)    0.050(3)    0.016(2)    0.018(2)    0.010(2)   
 C(24)  0.022(2)    0.021(2)    0.018(2)    0.011(1)    0.007(1)    0.006(1)   
 C(25)  0.022(2)    0.025(2)    0.021(2)    0.012(1)    0.008(1)    0.008(1)   
 C(26)  0.017(2)    0.025(2)    0.026(2)    0.005(1)    0.004(2)    -0.000(2)  
 C(27)  0.030(2)    0.035(2)    0.026(2)    0.015(2)    0.015(2)    0.008(2)   
 C(28)  0.025(2)    0.023(2)    0.028(2)    0.012(1)    0.009(2)    0.009(2)   
 C(29)  0.019(2)    0.020(2)    0.017(2)    0.009(1)    0.007(1)    0.005(1)   
 C(30)  0.028(2)    0.023(2)    0.028(2)    0.010(1)    0.008(2)    0.005(2)   
 C(31)  0.019(2)    0.020(2)    0.025(2)    0.006(1)    0.003(1)    0.003(1)   
 C(32)  0.019(2)    0.020(2)    0.028(2)    0.007(1)    0.011(1)    0.012(1)   
 C(33)  0.037(2)    0.029(2)    0.034(2)    0.015(2)    0.012(2)    0.014(2)   
 C(34)  0.038(2)    0.023(2)    0.038(2)    0.007(2)    0.020(2)    0.010(2)   
 C(35)  0.034(2)    0.048(3)    0.027(2)    0.017(2)    0.006(2)    -0.008(2)  
 C(36)  0.028(2)    0.025(2)    0.028(2)    0.012(2)    0.015(2)    0.013(2)   

#==============================================================================

_computing_data_collection            'PROCESS-AUTO'
_computing_cell_refinement            'PROCESS-AUTO'
_computing_data_reduction             'CrystalStructure'
_computing_structure_solution         'SIR92'
_computing_structure_refinement       'CRYSTALS'
_computing_publication_material       'CrystalStructure 3.6.0'
_computing_molecular_graphics          ?

#==============================================================================

# MOLECULAR GEOMETRY

_geom_special_details
;
    ENTER SPECIAL DETAILS OF THE MOLECULAR GEOMETRY
;

loop_
_geom_bond_atom_site_label_1
_geom_bond_atom_site_label_2
_geom_bond_distance
_geom_bond_publ_flag
_geom_bond_site_symmetry_1
_geom_bond_site_symmetry_2
Si(1)     C(13)     1.883(4)    ?     . .
Si(1)     C(23)     1.865(5)    ?     . .
Si(1)     C(27)     1.856(4)    ?     . .
Si(1)     C(35)     1.873(4)    ?     . .
F(1)      C(19)     1.325(4)    ?     . .
F(2)      C(19)     1.293(4)    ?     . .
F(3)      C(19)     1.343(5)    ?     . .
O(1)      C(17)     1.197(4)    ?     . .
O(2)      C(17)     1.347(5)    ?     . .
O(2)      C(28)     1.443(4)    ?     . .
N(1)      C(17)     1.383(4)    ?     . .
N(1)      C(24)     1.487(4)    ?     . .
N(1)      C(29)     1.396(5)    ?     . .
N(2)      C(11)     1.415(5)    ?     . .
N(2)      C(29)     1.267(4)    ?     . .
C(9)      C(11)     1.404(4)    ?     . .
C(9)      C(25)     1.371(6)    ?     . .
C(10)     C(31)     1.387(6)    ?     . .
C(10)     C(32)     1.390(4)    ?     . .
C(11)     C(31)     1.375(5)    ?     . .
C(12)     C(14)     1.479(4)    ?     . .
C(12)     C(15)     1.372(6)    ?     . .
C(12)     C(22)     1.438(5)    ?     . .
C(13)     C(14)     1.346(4)    ?     . .
C(13)     C(29)     1.509(4)    ?     . .
C(15)     C(20)     1.411(5)    ?     . .
C(16)     C(18)     1.415(5)    ?     . .
C(16)     C(22)     1.416(4)    ?     . .
C(16)     C(26)     1.419(6)    ?     . .
C(18)     C(34)     1.363(6)    ?     . .
C(19)     C(32)     1.484(6)    ?     . .
C(20)     C(26)     1.361(5)    ?     . .
C(21)     C(24)     1.528(4)    ?     . .
C(22)     C(30)     1.425(6)    ?     . .
C(24)     C(28)     1.530(6)    ?     . .
C(24)     C(36)     1.514(5)    ?     . .
C(25)     C(32)     1.388(5)    ?     . .
C(30)     C(33)     1.369(5)    ?     . .
C(33)     C(34)     1.405(5)    ?     . .
C(9)      H(10)     0.87(3)     ?     . .
C(10)     H(11)     0.95(4)     ?     . .
C(14)     H(29)     0.97(4)     ?     . .
C(15)     H(28)     0.93(4)     ?     . .
C(18)     H(25)     0.95(4)     ?     . .
C(20)     H(27)     1.02(4)     ?     . .
C(21)     H(6)      1.07(4)     ?     . .
C(21)     H(7)      1.03(4)     ?     . .
C(21)     H(8)      0.95(5)     ?     . .
C(23)     H(13)     1.04(4)     ?     . .
C(23)     H(14)     0.95(5)     ?     . .
C(23)     H(15)     0.97(6)     ?     . .
C(25)     H(9)      1.01(4)     ?     . .
C(26)     H(26)     0.93(3)     ?     . .
C(27)     H(19)     0.97(4)     ?     . .
C(27)     H(20)     0.95(4)     ?     . .
C(27)     H(21)     1.01(5)     ?     . .
C(28)     H(1)      1.00(3)     ?     . .
C(28)     H(2)      1.08(3)     ?     . .
C(30)     H(22)     0.93(3)     ?     . .
C(31)     H(12)     0.98(4)     ?     . .
C(33)     H(23)     0.99(6)     ?     . .
C(34)     H(24)     0.95(4)     ?     . .
C(35)     H(16)     1.03(4)     ?     . .
C(35)     H(17)     1.02(4)     ?     . .
C(35)     H(18)     0.87(5)     ?     . .
C(36)     H(3)      1.03(4)     ?     . .
C(36)     H(4)      1.01(3)     ?     . .
C(36)     H(5)      0.87(5)     ?     . .
H(24)     C(34)     0.95(4)     ?     . .
H(26)     C(26)     0.93(3)     ?     . .

loop_
_geom_angle_atom_site_label_1
_geom_angle_atom_site_label_2
_geom_angle_atom_site_label_3
_geom_angle
_geom_angle_publ_flag
_geom_angle_site_symmetry_1
_geom_angle_site_symmetry_2
_geom_angle_site_symmetry_3
Si(1)     C(13)     C(14)     125.8(3)    ?     . . .
C(23)     Si(1)     C(13)     113.6(2)    ?     . . .
C(27)     Si(1)     C(13)     109.5(2)    ?     . . .
Si(1)     C(13)     C(29)     117.9(2)    ?     . . .
C(35)     Si(1)     C(13)     105.8(2)    ?     . . .
C(27)     Si(1)     C(23)     108.6(2)    ?     . . .
C(35)     Si(1)     C(23)     109.9(2)    ?     . . .
C(35)     Si(1)     C(27)     109.4(2)    ?     . . .
F(1)      C(19)     F(2)      107.2(4)    ?     . . .
F(1)      C(19)     F(3)      104.0(3)    ?     . . .
F(1)      C(19)     C(32)     113.8(3)    ?     . . .
F(2)      C(19)     F(3)      105.5(3)    ?     . . .
F(2)      C(19)     C(32)     114.4(3)    ?     . . .
F(3)      C(19)     C(32)     111.3(4)    ?     . . .
O(1)      C(17)     O(2)      122.2(3)    ?     . . .
O(1)      C(17)     N(1)      129.0(4)    ?     . . .
O(2)      C(17)     N(1)      108.8(3)    ?     . . .
C(28)     O(2)      C(17)     110.1(3)    ?     . . .
O(2)      C(28)     C(24)     105.8(3)    ?     . . .
C(29)     N(1)      C(17)     124.2(3)    ?     . . .
C(24)     N(1)      C(17)     110.7(3)    ?     . . .
C(29)     N(1)      C(24)     124.2(3)    ?     . . .
N(1)      C(24)     C(28)     98.7(3)     ?     . . .
N(1)      C(24)     C(21)     110.7(3)    ?     . . .
N(1)      C(24)     C(36)     112.7(3)    ?     . . .
N(1)      C(29)     N(2)      116.5(3)    ?     . . .
N(1)      C(29)     C(13)     118.0(3)    ?     . . .
C(29)     N(2)      C(11)     121.4(3)    ?     . . .
N(2)      C(11)     C(9)      120.6(3)    ?     . . .
N(2)      C(11)     C(31)     119.9(3)    ?     . . .
N(2)      C(29)     C(13)     125.6(3)    ?     . . .
C(25)     C(9)      C(11)     120.2(3)    ?     . . .
C(9)      C(11)     C(31)     119.0(4)    ?     . . .
C(9)      C(25)     C(32)     120.4(3)    ?     . . .
C(10)     C(31)     C(11)     121.2(3)    ?     . . .
C(32)     C(10)     C(31)     119.2(3)    ?     . . .
C(10)     C(32)     C(19)     120.2(3)    ?     . . .
C(10)     C(32)     C(25)     119.8(4)    ?     . . .
C(12)     C(14)     C(13)     123.4(4)    ?     . . .
C(15)     C(12)     C(14)     120.7(3)    ?     . . .
C(22)     C(12)     C(14)     120.7(3)    ?     . . .
C(12)     C(15)     C(20)     122.0(3)    ?     . . .
C(22)     C(12)     C(15)     118.6(3)    ?     . . .
C(12)     C(22)     C(30)     121.5(3)    ?     . . .
C(12)     C(22)     C(16)     119.6(3)    ?     . . .
C(29)     C(13)     C(14)     116.1(3)    ?     . . .
C(15)     C(20)     C(26)     119.7(4)    ?     . . .
C(22)     C(16)     C(18)     119.4(3)    ?     . . .
C(26)     C(16)     C(18)     121.8(3)    ?     . . .
C(16)     C(18)     C(34)     120.7(3)    ?     . . .
C(16)     C(22)     C(30)     118.7(3)    ?     . . .
C(26)     C(16)     C(22)     118.8(3)    ?     . . .
C(16)     C(26)     C(20)     121.2(3)    ?     . . .
C(18)     C(34)     C(33)     120.0(4)    ?     . . .
C(19)     C(32)     C(25)     120.0(3)    ?     . . .
C(21)     C(24)     C(28)     111.7(3)    ?     . . .
C(21)     C(24)     C(36)     112.3(3)    ?     . . .
C(22)     C(30)     C(33)     119.9(3)    ?     . . .
C(36)     C(24)     C(28)     109.9(3)    ?     . . .
C(30)     C(33)     C(34)     121.2(4)    ?     . . .
Si(1)     C(23)     H(13)     119(2)      ?     . . .
Si(1)     C(23)     H(14)     114(3)      ?     . . .
Si(1)     C(23)     H(15)     107(3)      ?     . . .
Si(1)     C(27)     H(19)     109(1)      ?     . . .
Si(1)     C(27)     H(20)     113(3)      ?     . . .
Si(1)     C(27)     H(21)     110(2)      ?     . . .
Si(1)     C(35)     H(16)     111(2)      ?     . . .
Si(1)     C(35)     H(17)     109(1)      ?     . . .
Si(1)     C(35)     H(18)     113(2)      ?     . . .
O(2)      C(28)     H(1)      107(2)      ?     . . .
O(2)      C(28)     H(2)      107(1)      ?     . . .
H(10)     C(9)      C(11)     117(2)      ?     . . .
C(9)      C(25)     H(9)      118(2)      ?     . . .
H(10)     C(9)      C(25)     122(2)      ?     . . .
H(11)     C(10)     C(31)     120(2)      ?     . . .
C(10)     C(31)     H(12)     123(2)      ?     . . .
H(11)     C(10)     C(32)     120(2)      ?     . . .
C(11)     C(31)     H(12)     115(2)      ?     . . .
C(12)     C(14)     H(29)     117(1)      ?     . . .
C(12)     C(15)     H(28)     117(2)      ?     . . .
C(13)     C(14)     H(29)     118(1)      ?     . . .
H(28)     C(15)     C(20)     120(2)      ?     . . .
C(15)     C(20)     H(27)     120(1)      ?     . . .
C(16)     C(18)     H(25)     112(2)      ?     . . .
C(16)     C(26)     H(26)     122(2)      ?     . . .
C(18)     C(34)     H(24)     122(2)      ?     . . .
H(25)     C(18)     C(34)     126(2)      ?     . . .
H(27)     C(20)     C(26)     119(1)      ?     . . .
C(20)     C(26)     H(26)     116(2)      ?     . . .
H(8)      C(21)     C(24)     102(2)      ?     . . .
H(6)      C(21)     C(24)     110(1)      ?     . . .
H(7)      C(21)     C(24)     110(1)      ?     . . .
H(8)      C(21)     H(6)      114(3)      ?     . . .
H(7)      C(21)     H(6)      106(2)      ?     . . .
H(8)      C(21)     H(7)      112(3)      ?     . . .
C(22)     C(30)     H(22)     124(2)      ?     . . .
H(14)     C(23)     H(13)     115(4)      ?     . . .
H(15)     C(23)     H(13)     98(4)       ?     . . .
H(15)     C(23)     H(14)     96(4)       ?     . . .
C(24)     C(28)     H(1)      114(1)      ?     . . .
C(24)     C(28)     H(2)      111(1)      ?     . . .
C(24)     C(36)     H(3)      105(1)      ?     . . .
C(24)     C(36)     H(4)      111(2)      ?     . . .
C(24)     C(36)     H(5)      107(3)      ?     . . .
H(9)      C(25)     C(32)     121(2)      ?     . . .
H(20)     C(27)     H(19)     110(4)      ?     . . .
H(21)     C(27)     H(19)     114(3)      ?     . . .
H(21)     C(27)     H(20)     99(3)       ?     . . .
H(2)      C(28)     H(1)      109(2)      ?     . . .
H(22)     C(30)     C(33)     115(2)      ?     . . .
C(30)     C(33)     H(23)     114(2)      ?     . . .
C(33)     C(34)     H(24)     117(2)      ?     . . .
H(23)     C(33)     C(34)     124(2)      ?     . . .
H(17)     C(35)     H(16)     104(3)      ?     . . .
H(18)     C(35)     H(16)     109(3)      ?     . . .
H(18)     C(35)     H(17)     107(3)      ?     . . .
H(4)      C(36)     H(3)      113(3)      ?     . . .
H(5)      C(36)     H(3)      111(3)      ?     . . .
H(5)      C(36)     H(4)      107(3)      ?     . . .

loop_
_geom_torsion_atom_site_label_1
_geom_torsion_atom_site_label_2
_geom_torsion_atom_site_label_3
_geom_torsion_atom_site_label_4
_geom_torsion
_geom_torsion_publ_flag
_geom_torsion_site_symmetry_1
_geom_torsion_site_symmetry_2
_geom_torsion_site_symmetry_3
_geom_torsion_site_symmetry_4
C(23)     Si(1)     C(13)     C(14)     -86.1(3)    ?     . . . .
C(23)     Si(1)     C(13)     C(29)     100.0(3)    ?     . . . .
C(27)     Si(1)     C(13)     C(14)     35.5(4)     ?     . . . .
C(27)     Si(1)     C(13)     C(29)     -138.3(2)   ?     . . . .
C(35)     Si(1)     C(13)     C(14)     153.3(3)    ?     . . . .
C(35)     Si(1)     C(13)     C(29)     -20.6(3)    ?     . . . .
C(28)     O(2)      C(17)     O(1)      179.5(2)    ?     . . . .
C(28)     O(2)      C(17)     N(1)      -1.0(3)     ?     . . . .
C(17)     O(2)      C(28)     C(24)     15.8(3)     ?     . . . .
C(24)     N(1)      C(17)     O(1)      164.4(3)    ?     . . . .
C(24)     N(1)      C(17)     O(2)      -15.1(3)    ?     . . . .
C(29)     N(1)      C(17)     O(1)      -5.0(5)     ?     . . . .
C(29)     N(1)      C(17)     O(2)      175.5(2)    ?     . . . .
C(17)     N(1)      C(24)     C(21)     -94.2(3)    ?     . . . .
C(17)     N(1)      C(24)     C(28)     23.0(3)     ?     . . . .
C(17)     N(1)      C(24)     C(36)     138.9(3)    ?     . . . .
C(29)     N(1)      C(24)     C(21)     75.1(4)     ?     . . . .
C(29)     N(1)      C(24)     C(28)     -167.7(3)   ?     . . . .
C(29)     N(1)      C(24)     C(36)     -51.7(4)    ?     . . . .
C(17)     N(1)      C(29)     N(2)      153.6(3)    ?     . . . .
C(17)     N(1)      C(29)     C(13)     -26.7(4)    ?     . . . .
C(24)     N(1)      C(29)     N(2)      -14.4(4)    ?     . . . .
C(24)     N(1)      C(29)     C(13)     165.4(3)    ?     . . . .
C(29)     N(2)      C(11)     C(9)      -62.1(5)    ?     . . . .
C(29)     N(2)      C(11)     C(31)     126.1(3)    ?     . . . .
C(11)     N(2)      C(29)     N(1)      169.3(3)    ?     . . . .
C(11)     N(2)      C(29)     C(13)     -10.4(5)    ?     . . . .
C(25)     C(9)      C(11)     N(2)      -171.7(3)   ?     . . . .
C(25)     C(9)      C(11)     C(31)     0.2(4)      ?     . . . .
C(11)     C(9)      C(25)     C(32)     -0.7(5)     ?     . . . .
C(32)     C(10)     C(31)     C(11)     -3.6(5)     ?     . . . .
C(31)     C(10)     C(32)     C(19)     -176.0(3)   ?     . . . .
C(31)     C(10)     C(32)     C(25)     3.0(5)      ?     . . . .
N(2)      C(11)     C(31)     C(10)     173.9(3)    ?     . . . .
C(9)      C(11)     C(31)     C(10)     2.0(5)      ?     . . . .
C(15)     C(12)     C(14)     C(13)     69.9(5)     ?     . . . .
C(22)     C(12)     C(14)     C(13)     -111.2(4)   ?     . . . .
C(14)     C(12)     C(15)     C(20)     -179.5(3)   ?     . . . .
C(22)     C(12)     C(15)     C(20)     1.6(5)      ?     . . . .
C(14)     C(12)     C(22)     C(16)     179.0(3)    ?     . . . .
C(14)     C(12)     C(22)     C(30)     2.4(5)      ?     . . . .
C(15)     C(12)     C(22)     C(16)     -2.1(5)     ?     . . . .
C(15)     C(12)     C(22)     C(30)     -178.7(3)   ?     . . . .
Si(1)     C(13)     C(14)     C(12)     10.6(6)     ?     . . . .
C(29)     C(13)     C(14)     C(12)     -175.5(3)   ?     . . . .
Si(1)     C(13)     C(29)     N(1)      113.9(3)    ?     . . . .
Si(1)     C(13)     C(29)     N(2)      -66.5(4)    ?     . . . .
C(14)     C(13)     C(29)     N(1)      -60.6(4)    ?     . . . .
C(14)     C(13)     C(29)     N(2)      119.1(4)    ?     . . . .
C(12)     C(15)     C(20)     C(26)     -0.6(6)     ?     . . . .
C(22)     C(16)     C(18)     C(34)     0.9(6)      ?     . . . .
C(26)     C(16)     C(18)     C(34)     -179.0(4)   ?     . . . .
C(18)     C(16)     C(22)     C(12)     -178.4(3)   ?     . . . .
C(18)     C(16)     C(22)     C(30)     -1.6(5)     ?     . . . .
C(26)     C(16)     C(22)     C(12)     1.6(5)      ?     . . . .
C(26)     C(16)     C(22)     C(30)     178.3(3)    ?     . . . .
C(18)     C(16)     C(26)     C(20)     179.4(4)    ?     . . . .
C(22)     C(16)     C(26)     C(20)     -0.6(6)     ?     . . . .
C(16)     C(18)     C(34)     C(33)     -0.3(6)     ?     . . . .
F(1)      C(19)     C(32)     C(10)     10.7(5)     ?     . . . .
F(1)      C(19)     C(32)     C(25)     -168.4(3)   ?     . . . .
F(2)      C(19)     C(32)     C(10)     -112.9(4)   ?     . . . .
F(2)      C(19)     C(32)     C(25)     68.1(5)     ?     . . . .
F(3)      C(19)     C(32)     C(10)     127.7(3)    ?     . . . .
F(3)      C(19)     C(32)     C(25)     -51.3(4)    ?     . . . .
C(15)     C(20)     C(26)     C(16)     0.1(5)      ?     . . . .
C(12)     C(22)     C(30)     C(33)     178.5(4)    ?     . . . .
C(16)     C(22)     C(30)     C(33)     1.8(5)      ?     . . . .
N(1)      C(24)     C(28)     O(2)      -22.4(3)    ?     . . . .
C(21)     C(24)     C(28)     O(2)      94.2(3)     ?     . . . .
C(36)     C(24)     C(28)     O(2)      -140.5(2)   ?     . . . .
C(9)      C(25)     C(32)     C(10)     -1.0(5)     ?     . . . .
C(9)      C(25)     C(32)     C(19)     178.1(3)    ?     . . . .
C(22)     C(30)     C(33)     C(34)     -1.3(6)     ?     . . . .
C(30)     C(33)     C(34)     C(18)     0.5(7)      ?     . . . .

loop_
_geom_contact_atom_site_label_1
_geom_contact_atom_site_label_2
_geom_contact_distance
_geom_contact_publ_flag
_geom_contact_site_symmetry_1
_geom_contact_site_symmetry_2
Si(1)     O(1)      3.576(3)    ?     . .
Si(1)     N(2)      3.499(3)    ?     . .
Si(1)     C(11)     3.535(4)    ?     . .
Si(1)     C(12)     3.283(3)    ?     . .
Si(1)     C(14)     2.884(4)    ?     . .
Si(1)     C(29)     2.913(4)    ?     . .
F(1)      F(2)      2.107(3)    ?     . .
F(1)      F(3)      2.103(4)    ?     . .
F(1)      O(2)      3.249(3)    ?     . 56501
F(1)      N(1)      3.460(3)    ?     . 56501
F(1)      C(10)     2.726(5)    ?     . .
F(1)      C(14)     3.499(5)    ?     . 56501
F(1)      C(17)     3.325(4)    ?     . 56501
F(1)      C(20)     3.500(5)    ?     . 67602
F(1)      C(28)     3.340(4)    ?     . 56501
F(1)      C(32)     2.354(4)    ?     . .
F(2)      F(2)      3.094(4)    ?     . 67602
F(2)      F(3)      2.099(4)    ?     . .
F(2)      C(10)     3.363(4)    ?     . .
F(2)      C(25)     3.020(5)    ?     . .
F(2)      C(25)     3.139(4)    ?     . 67602
F(2)      C(30)     3.334(5)    ?     . 56501
F(2)      C(32)     2.336(5)    ?     . .
F(3)      C(10)     3.461(5)    ?     . .
F(3)      C(20)     3.578(5)    ?     . 67602
F(3)      C(25)     2.869(5)    ?     . .
F(3)      C(32)     2.335(5)    ?     . .
F(3)      C(36)     3.528(5)    ?     . 77602
O(1)      O(2)      2.228(4)    ?     . .
O(1)      N(1)      2.330(4)    ?     . .
O(1)      C(13)     2.847(4)    ?     . .
O(1)      C(14)     3.147(4)    ?     . .
O(1)      C(24)     3.518(4)    ?     . .
O(1)      C(28)     3.429(5)    ?     . .
O(1)      C(29)     2.930(4)    ?     . .
O(1)      C(30)     3.391(3)    ?     . .
O(2)      F(1)      3.249(3)    ?     . 54501
O(2)      N(1)      2.220(4)    ?     . .
O(2)      C(10)     3.359(4)    ?     . 54501
O(2)      C(21)     3.228(4)    ?     . .
O(2)      C(24)     2.372(4)    ?     . .
O(2)      C(29)     3.559(5)    ?     . .
O(2)      C(36)     3.598(5)    ?     . .
N(1)      F(1)      3.460(3)    ?     . 54501
N(1)      N(2)      2.265(4)    ?     . .
N(1)      C(11)     3.589(5)    ?     . .
N(1)      C(13)     2.491(4)    ?     . .
N(1)      C(14)     3.018(4)    ?     . .
N(1)      C(21)     2.481(4)    ?     . .
N(1)      C(28)     2.290(5)    ?     . .
N(1)      C(36)     2.499(5)    ?     . .
N(2)      C(9)      2.448(5)    ?     . .
N(2)      C(13)     2.472(4)    ?     . .
N(2)      C(14)     3.433(3)    ?     . .
N(2)      C(17)     3.524(5)    ?     . .
N(2)      C(21)     3.107(5)    ?     . .
N(2)      C(24)     2.814(5)    ?     . .
N(2)      C(31)     2.415(5)    ?     . .
N(2)      C(35)     3.496(6)    ?     . .
N(2)      C(36)     2.987(6)    ?     . .
C(9)      C(10)     2.775(5)    ?     . .
C(9)      C(13)     3.188(5)    ?     . .
C(9)      C(16)     3.465(5)    ?     . 66602
C(9)      C(26)     3.594(6)    ?     . 66602
C(9)      C(29)     3.031(5)    ?     . .
C(9)      C(31)     2.394(4)    ?     . .
C(9)      C(32)     2.395(5)    ?     . .
C(10)     O(2)      3.359(4)    ?     . 56501
C(10)     C(11)     2.406(6)    ?     . .
C(10)     C(19)     2.491(5)    ?     . .
C(10)     C(25)     2.404(4)    ?     . .
C(11)     C(13)     2.890(4)    ?     . .
C(11)     C(23)     3.558(6)    ?     . .
C(11)     C(25)     2.405(5)    ?     . .
C(11)     C(29)     2.340(5)    ?     . .
C(11)     C(32)     2.780(5)    ?     . .
C(12)     C(13)     2.488(3)    ?     . .
C(12)     C(16)     2.467(4)    ?     . .
C(12)     C(20)     2.434(5)    ?     . .
C(12)     C(26)     2.812(4)    ?     . .
C(12)     C(27)     3.216(6)    ?     . .
C(12)     C(30)     2.498(5)    ?     . .
C(13)     C(15)     3.205(4)    ?     . .
C(13)     C(17)     2.943(5)    ?     . .
C(13)     C(22)     3.538(4)    ?     . .
C(13)     C(23)     3.135(6)    ?     . .
C(13)     C(27)     3.053(6)    ?     . .
C(13)     C(35)     2.996(5)    ?     . .
C(14)     F(1)      3.499(5)    ?     . 54501
C(14)     C(15)     2.478(5)    ?     . .
C(14)     C(17)     3.261(5)    ?     . .
C(14)     C(22)     2.535(4)    ?     . .
C(14)     C(27)     3.458(6)    ?     . .
C(14)     C(29)     2.424(4)    ?     . .
C(14)     C(30)     2.939(5)    ?     . .
C(15)     C(16)     2.795(5)    ?     . .
C(15)     C(22)     2.416(5)    ?     . .
C(15)     C(26)     2.397(4)    ?     . .
C(16)     C(9)      3.465(5)    ?     . 66602
C(16)     C(20)     2.422(6)    ?     . .
C(16)     C(30)     2.445(5)    ?     . .
C(16)     C(33)     2.789(6)    ?     . .
C(16)     C(34)     2.415(6)    ?     . .
C(17)     F(1)      3.325(4)    ?     . 54501
C(17)     C(21)     3.213(4)    ?     . .
C(17)     C(24)     2.361(5)    ?     . .
C(17)     C(28)     2.287(6)    ?     . .
C(17)     C(29)     2.456(5)    ?     . .
C(17)     C(36)     3.592(5)    ?     . .
C(18)     C(22)     2.444(4)    ?     . .
C(18)     C(25)     3.598(6)    ?     . 66602
C(18)     C(26)     2.475(6)    ?     . .
C(18)     C(30)     2.796(5)    ?     . .
C(18)     C(31)     3.592(6)    ?     . 44501
C(18)     C(33)     2.398(6)    ?     . .
C(19)     C(25)     2.487(6)    ?     . .
C(20)     F(1)      3.500(5)    ?     . 67602
C(20)     F(3)      3.578(5)    ?     . 67602
C(20)     C(22)     2.808(6)    ?     . .
C(21)     C(28)     2.531(5)    ?     . .
C(21)     C(29)     3.231(5)    ?     . .
C(21)     C(36)     2.527(5)    ?     . .
C(22)     C(26)     2.441(5)    ?     . .
C(22)     C(27)     3.421(5)    ?     . .
C(22)     C(33)     2.419(6)    ?     . .
C(22)     C(34)     2.808(5)    ?     . .
C(23)     C(27)     3.022(7)    ?     . .
C(23)     C(35)     3.060(7)    ?     . .
C(24)     C(29)     2.549(5)    ?     . .
C(25)     F(2)      3.139(4)    ?     . 67602
C(25)     C(18)     3.598(6)    ?     . 66602
C(25)     C(31)     2.759(4)    ?     . .
C(26)     C(9)      3.594(6)    ?     . 66602
C(27)     C(35)     3.044(5)    ?     . .
C(28)     F(1)      3.340(4)    ?     . 54501
C(28)     C(36)     2.492(6)    ?     . .
C(29)     C(31)     3.425(5)    ?     . .
C(29)     C(35)     3.183(6)    ?     . .
C(29)     C(36)     3.074(6)    ?     . .
C(30)     F(2)      3.334(5)    ?     . 54501
C(30)     C(34)     2.417(5)    ?     . .
C(31)     C(18)     3.592(6)    ?     . 66501
C(31)     C(32)     2.395(5)    ?     . .
C(36)     F(3)      3.528(5)    ?     . 77602
Si(1)     H(13)     2.54(5)     ?     . .
Si(1)     H(14)     2.43(7)     ?     . .
Si(1)     H(15)     2.35(6)     ?     . .
Si(1)     H(16)     2.45(3)     ?     . .
Si(1)     H(17)     2.41(3)     ?     . .
Si(1)     H(18)     2.36(4)     ?     . .
Si(1)     H(19)     2.36(4)     ?     . .
Si(1)     H(20)     2.40(4)     ?     . .
Si(1)     H(21)     2.40(4)     ?     . .
Si(1)     H(28)     3.56(3)     ?     . .
F(1)      H(2)      2.64(2)     ?     . 56501
F(1)      H(4)      3.13(3)     ?     . 56501
F(1)      H(11)     2.41(4)     ?     . .
F(1)      H(22)     3.16(3)     ?     . 56501
F(1)      H(26)     3.34(4)     ?     . 66501
F(1)      H(27)     2.73(4)     ?     . 67602
F(1)      H(28)     3.45(4)     ?     . 67602
F(1)      H(29)     2.62(4)     ?     . 56501
F(2)      H(9)      3.00(5)     ?     . .
F(2)      H(9)      2.64(4)     ?     . 67602
F(2)      H(11)     3.53(3)     ?     . .
F(2)      H(22)     3.12(3)     ?     . 56501
F(2)      H(28)     3.10(4)     ?     . 67602
F(2)      H(29)     3.44(4)     ?     . 56501
F(3)      H(3)      3.28(3)     ?     . 77602
F(3)      H(4)      3.56(4)     ?     . 77602
F(3)      H(5)      3.26(5)     ?     . 77602
F(3)      H(9)      2.70(5)     ?     . .
F(3)      H(13)     3.18(5)     ?     . 67602
F(3)      H(24)     3.50(4)     ?     . 66602
F(3)      H(25)     3.55(4)     ?     . 66501
F(3)      H(26)     2.79(3)     ?     . 66501
F(3)      H(27)     2.77(4)     ?     . 67602
F(3)      H(28)     3.37(5)     ?     . 67602
O(1)      H(17)     2.91(3)     ?     . .
O(1)      H(21)     3.00(5)     ?     . .
O(1)      H(22)     2.63(2)     ?     . .
O(1)      H(29)     3.28(3)     ?     . .
O(2)      H(1)      1.98(3)     ?     . .
O(2)      H(2)      2.05(3)     ?     . .
O(2)      H(8)      2.87(4)     ?     . .
O(2)      H(11)     2.41(4)     ?     . 54501
N(1)      H(1)      3.12(4)     ?     . .
N(1)      H(2)      2.83(4)     ?     . .
N(1)      H(3)      3.33(4)     ?     . .
N(1)      H(4)      2.65(4)     ?     . .
N(1)      H(5)      2.72(5)     ?     . .
N(1)      H(6)      3.41(3)     ?     . .
N(1)      H(7)      2.72(3)     ?     . .
N(1)      H(8)      2.56(4)     ?     . .
N(1)      H(17)     3.44(4)     ?     . .
N(1)      H(29)     2.80(3)     ?     . .
N(2)      H(4)      3.27(4)     ?     . .
N(2)      H(5)      2.49(5)     ?     . .
N(2)      H(7)      2.53(3)     ?     . .
N(2)      H(8)      3.56(5)     ?     . .
N(2)      H(10)     2.57(3)     ?     . .
N(2)      H(12)     2.53(4)     ?     . .
N(2)      H(16)     2.90(4)     ?     . .
N(2)      H(24)     3.06(4)     ?     . 66501
N(2)      H(29)     3.52(3)     ?     . .
C(9)      H(9)      2.05(5)     ?     . .
C(9)      H(12)     3.25(4)     ?     . .
C(9)      H(14)     3.47(7)     ?     . .
C(9)      H(25)     3.25(3)     ?     . 66501
C(9)      H(28)     3.55(3)     ?     . .
C(10)     H(2)      3.19(3)     ?     . 56501
C(10)     H(9)      3.32(4)     ?     . .
C(10)     H(12)     2.09(4)     ?     . .
C(10)     H(14)     2.99(6)     ?     . .
C(10)     H(25)     2.92(4)     ?     . 66501
C(11)     H(5)      3.44(5)     ?     . .
C(11)     H(9)      3.30(4)     ?     . .
C(11)     H(10)     1.97(3)     ?     . .
C(11)     H(11)     3.26(4)     ?     . .
C(11)     H(12)     2.00(4)     ?     . .
C(11)     H(14)     3.12(7)     ?     . .
C(11)     H(16)     3.19(4)     ?     . .
C(11)     H(24)     3.20(4)     ?     . 66501
C(11)     H(25)     3.23(4)     ?     . 66501
C(12)     H(10)     3.58(2)     ?     . 66602
C(12)     H(20)     2.79(6)     ?     . .
C(12)     H(21)     3.14(4)     ?     . .
C(12)     H(22)     2.74(3)     ?     . .
C(12)     H(27)     3.35(4)     ?     . .
C(12)     H(28)     1.98(5)     ?     . .
C(12)     H(28)     3.53(4)     ?     . 66602
C(12)     H(29)     2.11(4)     ?     . .
C(13)     H(10)     3.01(3)     ?     . .
C(13)     H(13)     3.50(6)     ?     . .
C(13)     H(14)     3.50(7)     ?     . .
C(13)     H(16)     3.18(3)     ?     . .
C(13)     H(17)     3.11(3)     ?     . .
C(13)     H(20)     3.34(5)     ?     . .
C(13)     H(21)     3.07(4)     ?     . .
C(13)     H(22)     3.46(3)     ?     . .
C(13)     H(28)     3.10(4)     ?     . .
C(13)     H(29)     2.00(3)     ?     . .
C(14)     H(10)     3.18(3)     ?     . .
C(14)     H(20)     3.43(6)     ?     . .
C(14)     H(21)     3.29(4)     ?     . .
C(14)     H(22)     2.68(3)     ?     . .
C(14)     H(28)     2.60(4)     ?     . .
C(14)     H(28)     3.47(4)     ?     . 66602
C(15)     H(3)      3.44(4)     ?     . 45501
C(15)     H(10)     3.52(3)     ?     . 66602
C(15)     H(13)     3.07(5)     ?     . .
C(15)     H(20)     3.08(5)     ?     . .
C(15)     H(26)     3.22(3)     ?     . .
C(15)     H(27)     2.12(3)     ?     . .
C(15)     H(29)     3.11(4)     ?     . .
C(15)     H(29)     3.05(3)     ?     . 66602
C(16)     H(2)      3.56(4)     ?     . 45501
C(16)     H(9)      3.07(5)     ?     . 66602
C(16)     H(10)     2.88(3)     ?     . 66602
C(16)     H(20)     3.25(4)     ?     . .
C(16)     H(22)     3.31(3)     ?     . .
C(16)     H(24)     3.29(5)     ?     . .
C(16)     H(25)     1.98(3)     ?     . .
C(16)     H(26)     2.07(4)     ?     . .
C(16)     H(27)     3.34(4)     ?     . .
C(17)     H(1)      3.03(4)     ?     . .
C(17)     H(2)      2.87(4)     ?     . .
C(17)     H(8)      2.90(3)     ?     . .
C(17)     H(11)     3.26(4)     ?     . 54501
C(17)     H(17)     3.34(4)     ?     . .
C(17)     H(22)     3.21(2)     ?     . .
C(17)     H(29)     3.11(3)     ?     . .
C(18)     H(9)      3.00(5)     ?     . 66602
C(18)     H(10)     3.50(3)     ?     . 66602
C(18)     H(23)     3.31(5)     ?     . .
C(18)     H(24)     2.04(5)     ?     . .
C(18)     H(26)     2.69(4)     ?     . .
C(19)     H(2)      3.60(2)     ?     . 56501
C(19)     H(9)      2.69(5)     ?     . .
C(19)     H(11)     2.66(3)     ?     . .
C(19)     H(22)     3.58(3)     ?     . 56501
C(19)     H(26)     3.46(4)     ?     . 66501
C(19)     H(27)     3.30(4)     ?     . 67602
C(19)     H(28)     3.59(4)     ?     . 67602
C(19)     H(29)     3.59(4)     ?     . 56501
C(20)     H(3)      3.02(4)     ?     . 45501
C(20)     H(4)      3.40(4)     ?     . 45501
C(20)     H(4)      3.09(3)     ?     . 66602
C(20)     H(10)     3.19(3)     ?     . 66602
C(20)     H(20)     3.43(5)     ?     . .
C(20)     H(26)     1.96(3)     ?     . .
C(20)     H(28)     2.04(3)     ?     . .
C(20)     H(29)     3.10(4)     ?     . 66602
C(21)     H(1)      2.61(4)     ?     . .
C(21)     H(2)      3.42(3)     ?     . .
C(21)     H(3)      2.72(3)     ?     . .
C(21)     H(4)      3.41(3)     ?     . .
C(21)     H(5)      2.62(4)     ?     . .
C(21)     H(15)     3.54(5)     ?     . 65501
C(21)     H(19)     3.54(4)     ?     . 65501
C(22)     H(9)      3.08(4)     ?     . 66602
C(22)     H(10)     3.24(3)     ?     . 66602
C(22)     H(20)     2.90(5)     ?     . .
C(22)     H(21)     3.04(4)     ?     . .
C(22)     H(22)     2.10(3)     ?     . .
C(22)     H(23)     3.28(6)     ?     . .
C(22)     H(25)     3.25(3)     ?     . .
C(22)     H(26)     3.30(4)     ?     . .
C(22)     H(28)     3.25(4)     ?     . .
C(22)     H(29)     2.94(3)     ?     . .
C(23)     H(3)      3.31(3)     ?     . 45501
C(23)     H(6)      3.34(4)     ?     . 45501
C(23)     H(16)     3.28(4)     ?     . .
C(23)     H(18)     3.25(4)     ?     . .
C(23)     H(19)     3.26(4)     ?     . .
C(23)     H(20)     3.17(5)     ?     . .
C(23)     H(23)     3.19(6)     ?     . 56501
C(23)     H(28)     3.31(4)     ?     . .
C(24)     H(1)      2.15(4)     ?     . .
C(24)     H(2)      2.17(3)     ?     . .
C(24)     H(3)      2.04(4)     ?     . .
C(24)     H(4)      2.11(4)     ?     . .
C(24)     H(5)      1.96(5)     ?     . .
C(24)     H(6)      2.15(3)     ?     . .
C(24)     H(7)      2.12(3)     ?     . .
C(24)     H(8)      1.96(4)     ?     . .
C(25)     H(10)     1.98(3)     ?     . .
C(25)     H(11)     3.27(3)     ?     . .
C(25)     H(14)     3.59(6)     ?     . .
C(25)     H(25)     3.09(3)     ?     . 66501
C(26)     H(2)      3.15(3)     ?     . 45501
C(26)     H(3)      3.53(3)     ?     . 45501
C(26)     H(4)      3.28(4)     ?     . 66602
C(26)     H(10)     2.85(3)     ?     . 66602
C(26)     H(20)     3.50(4)     ?     . .
C(26)     H(25)     2.55(4)     ?     . .
C(26)     H(27)     2.07(4)     ?     . .
C(26)     H(28)     3.23(3)     ?     . .
C(27)     H(1)      3.00(3)     ?     . 45501
C(27)     H(3)      3.54(3)     ?     . 45501
C(27)     H(6)      3.31(5)     ?     . 45501
C(27)     H(13)     3.31(5)     ?     . .
C(27)     H(15)     3.09(5)     ?     . .
C(27)     H(17)     3.23(3)     ?     . .
C(27)     H(18)     3.21(3)     ?     . .
C(28)     H(3)      2.63(3)     ?     . .
C(28)     H(4)      2.75(4)     ?     . .
C(28)     H(5)      3.23(5)     ?     . .
C(28)     H(6)      2.88(3)     ?     . .
C(28)     H(7)      3.41(4)     ?     . .
C(28)     H(8)      2.54(4)     ?     . .
C(28)     H(11)     2.94(3)     ?     . 54501
C(28)     H(19)     3.52(3)     ?     . 65501
C(28)     H(20)     3.16(5)     ?     . 65501
C(29)     H(4)      3.14(4)     ?     . .
C(29)     H(5)      2.91(5)     ?     . .
C(29)     H(7)      3.00(3)     ?     . .
C(29)     H(8)      3.44(4)     ?     . .
C(29)     H(10)     2.89(3)     ?     . .
C(29)     H(12)     3.52(4)     ?     . .
C(29)     H(16)     2.96(4)     ?     . .
C(29)     H(17)     3.12(3)     ?     . .
C(29)     H(29)     2.53(3)     ?     . .
C(30)     H(9)      3.06(4)     ?     . 66602
C(30)     H(20)     3.54(6)     ?     . .
C(30)     H(21)     3.04(4)     ?     . .
C(30)     H(23)     2.00(5)     ?     . .
C(30)     H(24)     3.26(4)     ?     . .
C(30)     H(29)     3.10(3)     ?     . .
C(31)     H(10)     3.17(3)     ?     . .
C(31)     H(11)     2.04(4)     ?     . .
C(31)     H(14)     2.88(6)     ?     . .
C(31)     H(16)     3.06(4)     ?     . .
C(31)     H(24)     3.45(5)     ?     . 66501
C(31)     H(25)     3.04(4)     ?     . 66501
C(32)     H(9)      2.10(4)     ?     . .
C(32)     H(10)     3.19(3)     ?     . .
C(32)     H(11)     2.04(3)     ?     . .
C(32)     H(12)     3.30(4)     ?     . .
C(32)     H(14)     3.38(6)     ?     . .
C(32)     H(25)     2.92(4)     ?     . 66501
C(33)     H(9)      2.99(4)     ?     . 66602
C(33)     H(22)     1.96(3)     ?     . .
C(33)     H(24)     2.03(3)     ?     . .
C(33)     H(25)     3.29(4)     ?     . .
C(34)     H(5)      3.37(5)     ?     . 44501
C(34)     H(9)      2.97(5)     ?     . 66602
C(34)     H(22)     3.22(3)     ?     . .
C(34)     H(23)     2.12(5)     ?     . .
C(34)     H(25)     2.07(4)     ?     . .
C(35)     H(12)     3.49(4)     ?     . .
C(35)     H(14)     3.15(6)     ?     . .
C(35)     H(15)     3.24(5)     ?     . .
C(35)     H(19)     3.11(3)     ?     . .
C(35)     H(21)     3.36(3)     ?     . .
C(36)     H(1)      3.07(4)     ?     . .
C(36)     H(2)      2.53(3)     ?     . .
C(36)     H(6)      2.72(3)     ?     . .
C(36)     H(7)      2.81(3)     ?     . .
C(36)     H(8)      3.27(5)     ?     . .
C(36)     H(13)     3.48(5)     ?     . 65501
C(36)     H(24)     3.29(4)     ?     . 66501
C(36)     H(26)     3.47(3)     ?     . 66602
C(36)     H(27)     3.28(4)     ?     . 65501
C(36)     H(27)     3.52(3)     ?     . 66602
H(1)      C(27)     3.00(3)     ?     . 65501
H(2)      F(1)      2.64(2)     ?     . 54501
H(2)      C(10)     3.19(3)     ?     . 54501
H(2)      C(16)     3.56(4)     ?     . 65501
H(2)      C(19)     3.60(2)     ?     . 54501
H(2)      C(26)     3.15(3)     ?     . 65501
H(3)      F(3)      3.28(3)     ?     . 77602
H(3)      C(15)     3.44(4)     ?     . 65501
H(3)      C(20)     3.02(4)     ?     . 65501
H(3)      C(23)     3.31(3)     ?     . 65501
H(3)      C(26)     3.53(3)     ?     . 65501
H(3)      C(27)     3.54(3)     ?     . 65501
H(4)      F(1)      3.13(3)     ?     . 54501
H(4)      F(3)      3.56(4)     ?     . 77602
H(4)      C(20)     3.40(4)     ?     . 65501
H(4)      C(20)     3.09(3)     ?     . 66602
H(4)      C(26)     3.28(4)     ?     . 66602
H(5)      F(3)      3.26(5)     ?     . 77602
H(5)      C(34)     3.37(5)     ?     . 66501
H(6)      C(23)     3.34(4)     ?     . 65501
H(6)      C(27)     3.31(5)     ?     . 65501
H(9)      F(2)      2.64(4)     ?     . 67602
H(9)      C(16)     3.07(5)     ?     . 66602
H(9)      C(18)     3.00(5)     ?     . 66602
H(9)      C(22)     3.08(4)     ?     . 66602
H(9)      C(30)     3.06(4)     ?     . 66602
H(9)      C(33)     2.99(4)     ?     . 66602
H(9)      C(34)     2.97(5)     ?     . 66602
H(10)     C(12)     3.58(2)     ?     . 66602
H(10)     C(15)     3.52(3)     ?     . 66602
H(10)     C(16)     2.88(3)     ?     . 66602
H(10)     C(18)     3.50(3)     ?     . 66602
H(10)     C(20)     3.19(3)     ?     . 66602
H(10)     C(22)     3.24(3)     ?     . 66602
H(10)     C(26)     2.85(3)     ?     . 66602
H(11)     O(2)      2.41(4)     ?     . 56501
H(11)     C(17)     3.26(4)     ?     . 56501
H(11)     C(28)     2.94(3)     ?     . 56501
H(13)     F(3)      3.18(5)     ?     . 67602
H(13)     C(36)     3.48(5)     ?     . 45501
H(15)     C(21)     3.54(5)     ?     . 45501
H(19)     C(21)     3.54(4)     ?     . 45501
H(19)     C(28)     3.52(3)     ?     . 45501
H(20)     C(28)     3.16(5)     ?     . 45501
H(22)     F(1)      3.16(3)     ?     . 54501
H(22)     F(2)      3.12(3)     ?     . 54501
H(22)     C(19)     3.58(3)     ?     . 54501
H(23)     C(23)     3.19(6)     ?     . 54501
H(24)     F(3)      3.50(5)     ?     . 66602
H(24)     N(2)      3.06(4)     ?     . 44501
H(24)     C(11)     3.20(4)     ?     . 44501
H(24)     C(16)     3.29(5)     ?     . .
H(24)     C(18)     2.04(5)     ?     . .
H(24)     C(30)     3.26(4)     ?     . .
H(24)     C(31)     3.45(5)     ?     . 44501
H(24)     C(33)     2.03(3)     ?     . .
H(24)     C(36)     3.29(4)     ?     . 44501
H(25)     F(3)      3.55(4)     ?     . 44501
H(25)     C(9)      3.25(3)     ?     . 44501
H(25)     C(10)     2.92(4)     ?     . 44501
H(25)     C(11)     3.23(4)     ?     . 44501
H(25)     C(25)     3.09(3)     ?     . 44501
H(25)     C(31)     3.04(4)     ?     . 44501
H(25)     C(32)     2.92(4)     ?     . 44501
H(26)     F(1)      3.34(4)     ?     . 44501
H(26)     F(3)      2.79(3)     ?     . 44501
H(26)     C(15)     3.22(3)     ?     . .
H(26)     C(16)     2.07(4)     ?     . .
H(26)     C(18)     2.69(4)     ?     . .
H(26)     C(19)     3.46(4)     ?     . 44501
H(26)     C(20)     1.96(3)     ?     . .
H(26)     C(22)     3.30(4)     ?     . .
H(26)     C(36)     3.47(3)     ?     . 66602
H(27)     F(1)      2.73(4)     ?     . 67602
H(27)     F(3)      2.77(4)     ?     . 67602
H(27)     C(19)     3.30(4)     ?     . 67602
H(27)     C(36)     3.28(4)     ?     . 45501
H(27)     C(36)     3.52(3)     ?     . 66602
H(28)     F(1)      3.45(4)     ?     . 67602
H(28)     F(2)      3.10(4)     ?     . 67602
H(28)     F(3)      3.37(5)     ?     . 67602
H(28)     C(12)     3.53(4)     ?     . 66602
H(28)     C(14)     3.47(4)     ?     . 66602
H(28)     C(19)     3.59(4)     ?     . 67602
H(29)     F(1)      2.62(4)     ?     . 54501
H(29)     F(2)      3.44(4)     ?     . 54501
H(29)     C(15)     3.05(3)     ?     . 66602
H(29)     C(19)     3.59(4)     ?     . 54501
H(29)     C(20)     3.10(4)     ?     . 66602

#==============================================================================

# Additional structures and associated data_? identifiers
# should be added at this point if there is more than one 
# structure analysis in the CIF.

#==============================================================================

#     End of CIF

#==============================================================================
